# Supplementary material for: Arc/Arg3.1 has an activity-regulated interaction with PICK1 that results in altered spatial dynamics
Source: PubMed Central journal article supplement (PMC6168463; doi:10.1038/s41598-018-32821-4), 2018-10-02

**Arc/Arg3.1 has an activity-regulated interaction with PICK1 that results in altered spatial dynamics**

**Brandee M. S. S. Goo<sup>1</sup>, Bethany J. Sanstrum<sup>1</sup>, Diana Z. Y. Holden<sup>1</sup>, Yi Yu<sup>1</sup>, and Nicholas G. James<sup>1\*</sup>**

**Supplemental Figure 1: GST-Arc pull-down of PICK1 from Brains.** GST-Arc co-immunoprecipitates with PICK1 while our negative control, GST, was not found to interact. Brain lysates were subjected to pull-down with GST-Arc followed by Westernblot (WB) with anti-PICK1 antibody. White spaces have been placed between each lane to indicate lanes were not run adjacent but rather place together for comparison purposes.

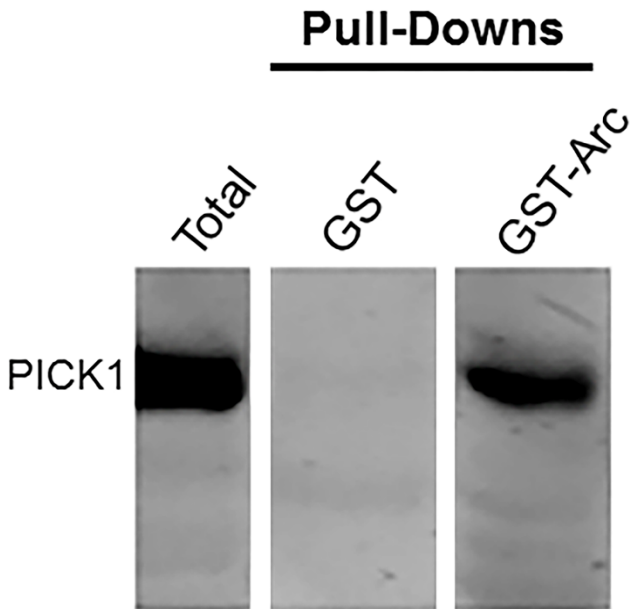

**Supplemental Figure 2: GST-Arc pull-down of PICK1 from Synaptosomes (Fig. 1A from Manuscript).** Lane 1,2,10 and 17: Total amount of PICK1; Lanes 3,4,11, and 12: PICK1 pulled-down using GST-Arc; Lanes 5,6,13 and 14: Total amount PICK1 pulled down using GST; Lanes 7,8,15, and 16: PICK1 pulled down using GST-Grb2; Lane 9: LI-COR MW ladder (150 and 50 kDa highlighted). Lanes 2, 3, 6 and 8 were used for image 1A in Manuscript. These lanes have been marked with black spacer bars to direct the reader to regions that were removed from the final manuscript figure.

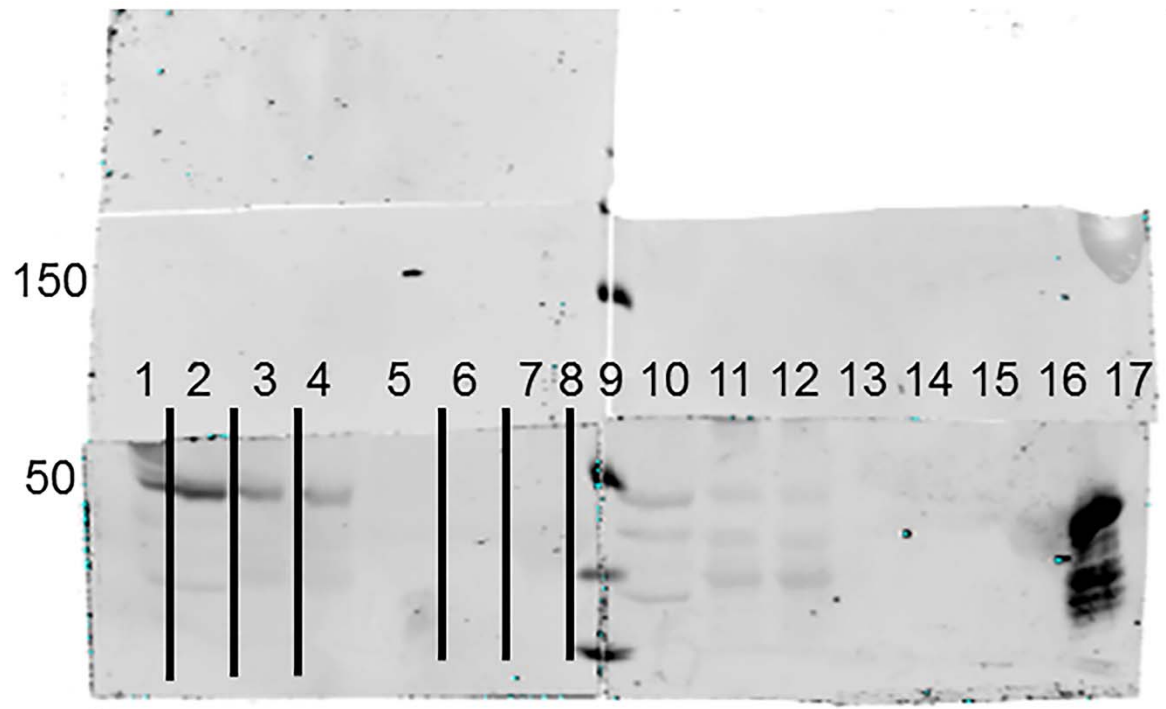

**Supplemental Figure. 3: EGFP-PICK1 self-association is not concentration dependent on the plasma membrane.** TIRF N&B was used to obtain the average brightness of EGFP-mCherry, which was converted to oligomeric state (normalized brightness) based on an EGFP standard (in solution and transfected in cells). The oligomeric state of EGFP-PICK1 on the plasma membrane did not show a trend ( $R^2 < 0.01$ ).

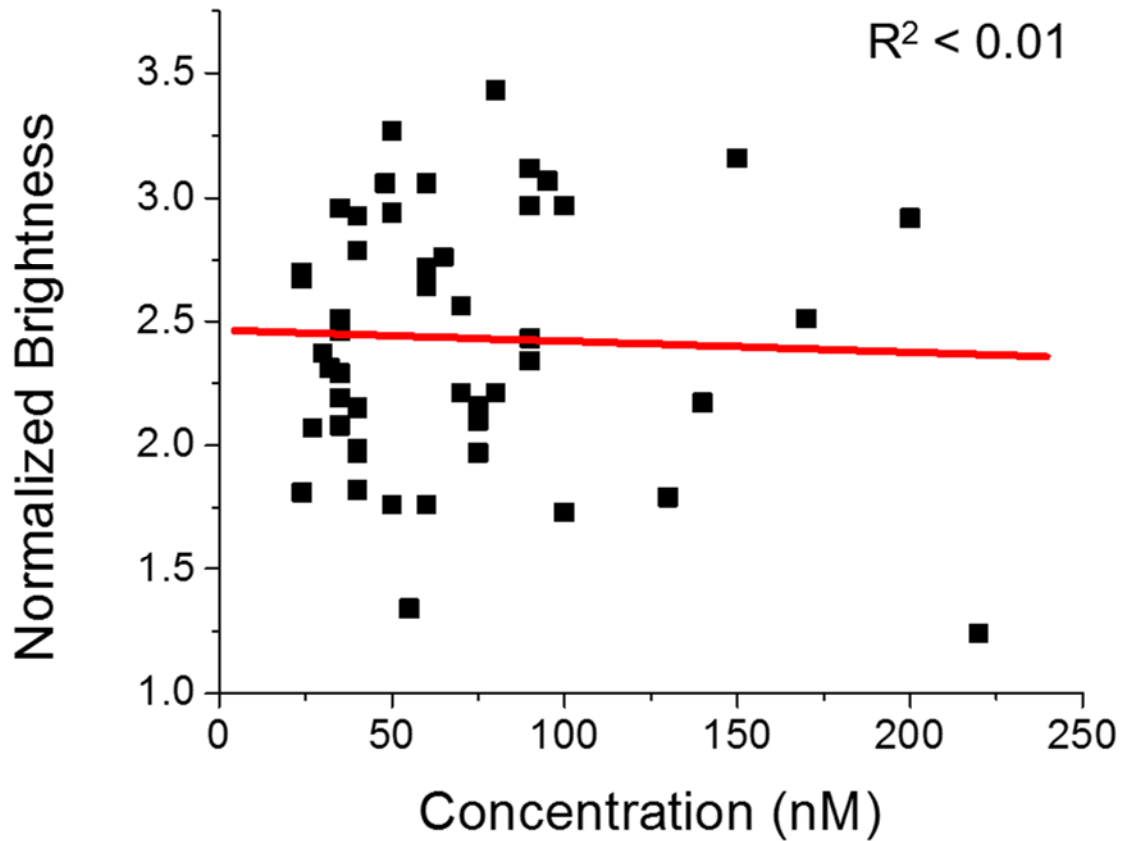

**Supplemental Figure 4: GST-Arc pull-down of PICK1B (Fig. 6B in Manuscript).** Lane 1: LI-COR MW ladder, Lanes 2 and 9: Total amount of PICK1 from transfected HEK293 cells; Lanes 3 and 10: PICK1 pulled down using GST; Lanes 4 and 11: PICK1 pulled-down using GST-Arc; Lanes 5 and 12: Total amount of PICK1B from transfected HEK293 cells; Lanes 6 and 13: PICK1B pulled down using GST; Lanes 7 and 14: PICK1B pulled down using GST-Arc. Green: PICK1 and PICK1B; Red: GST and GST-Arc. White box denotes the cropped region presented in Figure 6B.

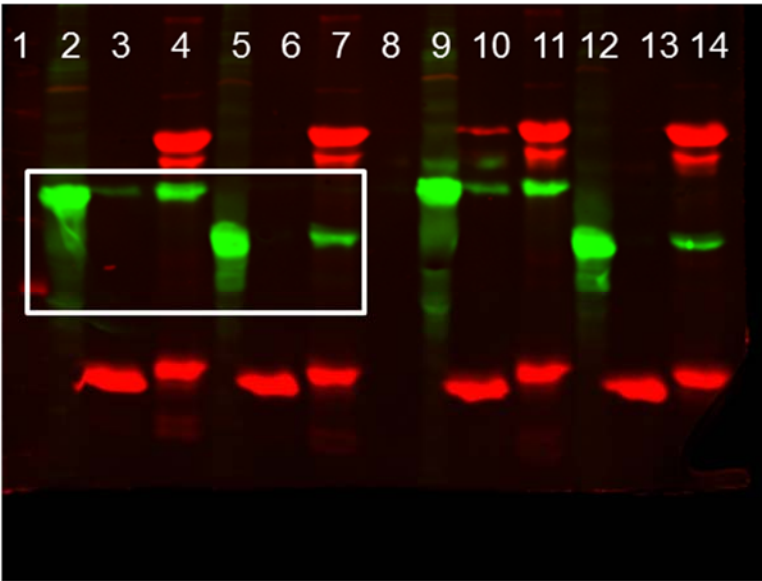

Supplement: 41598_2018_32821_MOESM1_ESM.pdf [file 41598_2018_32821_MOESM1_ESM.pdf]
